# Supplementary material for: Regio(ir)regular naphthalenediimide- and perylenediimide-bithiophene copolymers: how MO localization controls the bandgap
Source: Royal Society of Chemistry journal article supplement (doi:10.1039/c6tc03056d), 2016-01-01
Supplement: c6tc03056d1.pdf [file c6tc03056d1.pdf]

## Supporting Information

### Regio(ir)regular Naphthalenediimide- and Perylenediimide-Bithiophene Copolymers: How MO Localization Controls the Bandgap

Begoña Milián-Medina,<sup>1,2</sup> Michael Wykes,<sup>2</sup> Zhihua Chen,<sup>3</sup> Antonio Facchetti,<sup>3</sup> Johannes Gierschner<sup>2,\*</sup>

<sup>1</sup> Department for Physical Chemistry, Faculty of Chemistry, University of Valencia, Avda. Dr. Moliner 50, 46100 Burjassot (Valencia), Spain.

<sup>2</sup> Madrid Institute for Advanced Studies, IMDEA Nanoscience, Calle Faraday 9, Campus Cantoblanco, 28049 Madrid, Spain.

<sup>3</sup> Polyera Corporation, 8045 Lamon Avenue, Skokie, Illinois 60077, USA

Time-dependent (TD) calculations with a set of different functionals, i.e. (CAM)B3LYP, offset-corrected (OC-)M06HF<sup>[A]</sup> (with an OC = 0.75 eV; for detailed see Ref. [B]), however not only considering the energy of the lowest singlet state ( $S_1$ ), but the relevant  $S_n$  manifold in the visible range to verify whether the calculations are able to reproduce the experimental absorption spectra. For this, geometries of the co-oligomers (**NDI-2T**)<sub>n</sub> and (**PDI-2T**)<sub>n</sub> ( $n = 1, 2, 3$ ) in the electronic (singlet) ground state ( $S_0$ ) were optimized without symmetry restrictions at the B3LYP level of theory as defined in the Gaussian09 program package.<sup>[C]</sup> Truncation to  $n = 3$  was set by the limitations of the computational resources; absence of imaginary frequencies indicated true minima. Adiabatic energies of the first excited singlet state  $S_1$  were obtained as energy differences of the optimized  $S_1$  states using the respective TD functionals and the corresponding single point energies of the TD functionals at the B3LYP ground state geometries. The 6-311G\* basis set was used for all calculations. For singlet-triplet gaps (*vide infra*), we relied on B3LYP calculations, which - different to CAM-B3LYP and M06HF - was shown to tackle this issue in a satisfactory way for DA systems.

Transition densities were calculated from the CI coefficients and ground state orbitals using Multiwfn v. 3.3.6.<sup>[D]</sup> Natural transition orbital analysis (NTO) and transition densities were plotted in Gaussview (isosurface value 0.03). Gaussview was also used to plot the calculated absorption spectra in molar extinction coefficients  $\epsilon_m$  ( $M^{-1}\cdot cm^{-1}$ ), obtained from the calculated oscillator strength via  $f = 4.319 \cdot 10^{-9} \int \epsilon_m(\nu) d\nu$  with  $[\nu] = cm^{-1}$ .

Extrapolation to the polymer limit was done with an exponential function  $y = e^{-a \cdot N} + b$  (where  $N$  is the number of double bonds along the shortest path between the terminal C-atoms) as introduced by Meier.<sup>[E]</sup>

## 1. M06HF results

**Table S1a:** Vertical  $S_0 \rightarrow S_1$  electronic transition energies  $E$  with oscillator strength  $f$ , configuration interaction description (CI; only contributions  $\geq 5\%$ ) of  $r/i$ -(**NDI-2T**) $_n$  oligomers calculated at the TD-DFT (M06HF//B3LYP(6-311G\*)) level of theory.

| System                         | state          | $E / \text{eV}$<br>( $\lambda / \text{nm}$ ) | $f$   | main CI configuration                                     |
|--------------------------------|----------------|----------------------------------------------|-------|-----------------------------------------------------------|
| (NDI2T) <sub>1</sub>           | S <sub>1</sub> | 3.41 (364)                                   | 0.321 | H→L (62%)<br>H-4→L (9%)<br>H→L+1 (7%)<br>H-1→L (6%)       |
| <i>r</i> -(NDI2T) <sub>2</sub> | S <sub>1</sub> | 3.22 (386)                                   | 1.070 | H→L (61%)                                                 |
| <i>i</i> -(NDI2T) <sub>2</sub> | S <sub>1</sub> | 3.29 (377)                                   | 1.125 | H→L (55%)<br>H-1→L+1 (6%)<br>H-1→L+2 (6%)<br>H-8→L+1 (5%) |
| <i>r</i> -(NDI2T) <sub>3</sub> | S <sub>1</sub> | 3.14 (395)                                   | 2.019 | H→L (45%)<br>H-1→L+1 (14%)                                |
| <i>i</i> -(NDI2T) <sub>3</sub> | S <sub>1</sub> | 3.23 (383)                                   | 2.036 | H→L (42%)<br>H-1→L+1 (12%)<br>H-2→L+3 (6%)                |

**Table S1b:** Vertical  $S_0 \rightarrow S_n$  electronic transition energies  $E$  with oscillator strength  $f$  for such transitions with  $f > 0.2 f_{\text{max}}$ , CI description (contributions  $\geq 5\%$ ) of  $r/i$ -(**PDI-2T**) $_n$  oligomers calculated at the TD-DFT (M06HF//B3LYP(6-311G\*)) level of theory.

| System                         | state            | $E / \text{eV}$<br>( $\lambda / \text{nm}$ ) | $f$   | main CI configuration                                                                    |
|--------------------------------|------------------|----------------------------------------------|-------|------------------------------------------------------------------------------------------|
| (PDI2T) <sub>1</sub>           | S <sub>1</sub>   | 3.02 (410)                                   | 0.889 | H-1→L (62%)<br>H→L (34%)                                                                 |
|                                | S <sub>2</sub>   | 3.58 (346)                                   | 0.215 | H→L (32%)<br>H-1→L (17%)<br>H-4→L (11%)<br>H→L+1 (10%)                                   |
| <i>r</i> -(PDI2T) <sub>2</sub> | S <sub>1</sub>   | 3.00 (413)                                   | 0.827 | H-2→L+1 (37%)<br>H-3→L (37%)<br>H→L (10%)<br>H-1→L (6%)                                  |
|                                | S <sub>1</sub> ' | 3.03 (409)                                   | 1.049 | H-2→L+1 (33%)<br>H-3→L (20%)<br>H-2→L (12%)<br>H→L+1 (11%)<br>H-3→L+1 (8%)<br>H-1→L (8%) |
|                                | S <sub>2</sub>   | 3.54 (351)                                   | 0.494 | H→L (22%)<br>H→L+1 (13%)<br>H→L+2 (10%)<br>H-8→L+1 (7%)                                  |
| <i>i</i> -(PDI2T) <sub>2</sub> | S <sub>1</sub>   | 3.01 (412)                                   | 0.707 | H-2→L+1 (37%)<br>H-3→L (33%)<br>H-1→L (17%)                                              |
|                                | S <sub>1</sub> ' | 3.03 (409)                                   | 1.118 | H-2→L+1 (34%)<br>H-2→L (16%)                                                             |

|                                |                   |            |       |                                                                                                                  |
|--------------------------------|-------------------|------------|-------|------------------------------------------------------------------------------------------------------------------|
|                                |                   |            |       | H-3→L (14%)<br>H-1→L (10%)<br>H-3→L+1 (9%)<br>H→L+1 (9%)<br>H→L (35%)<br>H-1→L (11%)<br>H-8→L (7%)<br>H→L+2 (6%) |
| <i>r</i> -(PDI2T) <sub>3</sub> | S <sub>2</sub>    | 3.46 (359) | 0.584 |                                                                                                                  |
|                                | S <sub>1</sub>    | 3.00 (414) | 0.456 | H-5→L (29%)<br>H-4→L+1 (21%)<br>H-3→L+2 (18%)<br>H→L (9%)                                                        |
|                                | S <sub>1</sub> '  | 3.02 (410) | 1.587 | H-3→L+2 (33%)<br>H-4→L+1 (18%)<br>H-5→L (10%)<br>H→L+1 (7%)<br>H-1→L+2 (6%)                                      |
|                                | S <sub>1</sub> '' | 3.03 (409) | 0.793 | H-3→L+2 (15%)<br>H-5→L (13%)<br>H-3→L (13%)<br>H-4→L (12%)<br>H-5→L+1 (9%)                                       |
|                                | S <sub>2</sub>    | 3.54 (351) | 0.783 | H-1→L (13%)<br>H→L (11%)                                                                                         |
| <i>i</i> -(PDI2T) <sub>3</sub> | S <sub>1</sub>    | 3.00 (413) | 0.366 | H-5→L (25%)<br>H-4→L+1 (20%)<br>H-3→L+2 (18%)<br>H-1→L (11%)X                                                    |
|                                | S <sub>1</sub> '  | 3.02 (411) | 1.801 | H-3→L+2 (29%)<br>H-2→L+1 (14%)<br>H-4→L+1 (13%)<br>H-5→L+1 (11%)<br>H-4→L (8%)                                   |
|                                | S <sub>1</sub> '' | 3.03 (409) | 0.612 | H-3→L+2 (19%)<br>H-3→L (14%)<br>H-4→L (12%)<br>H-1→L+2 (9%)<br>H-5→L+1 (8%)<br>H-2→L+1 (6%)                      |
|                                | S <sub>2</sub>    | 3.40 (364) | 1.224 | H→L (32%)<br>H→L+3 (7%)                                                                                          |

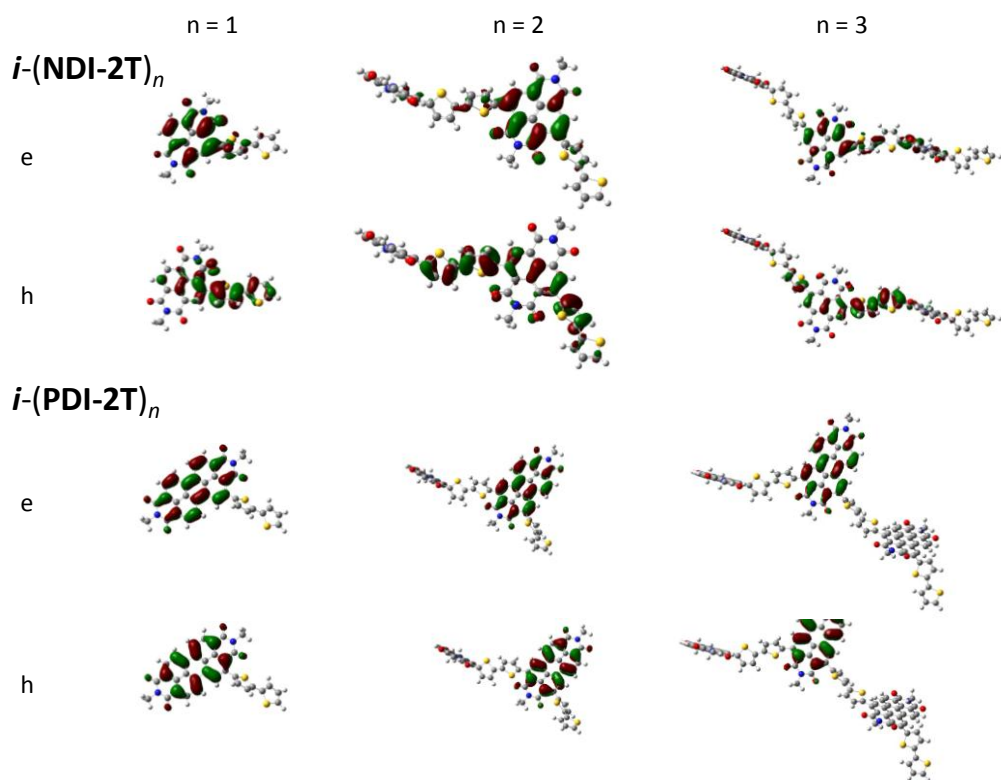

**Fig. S1:** Natural transition orbital (NTO) analysis for the first singlet transition ( $S_0 \rightarrow S_1$ ) of *i*-(NDI-2T)<sub>n</sub> and *i*-(PDI-2T)<sub>n</sub> oligomers (e = electron, h = hole); B3LYP//B3LYP (isosurface value 0.03).

## 2. B3PYP results

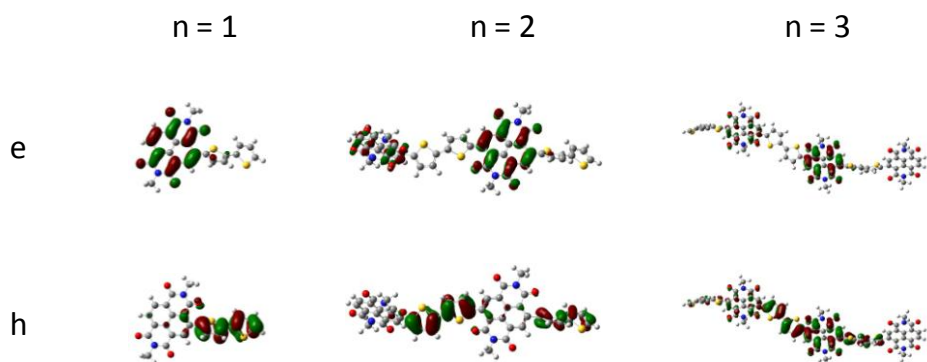

**Fig. S2a:** Natural transition orbital (NTO) analysis for the first singlet transition ( $S_0 \rightarrow S_1$ ) of *r*-(NDI-2T)<sub>n</sub> oligomers (e = electron, h = hole); B3LYP//B3LYP (isosurface value 0.03).

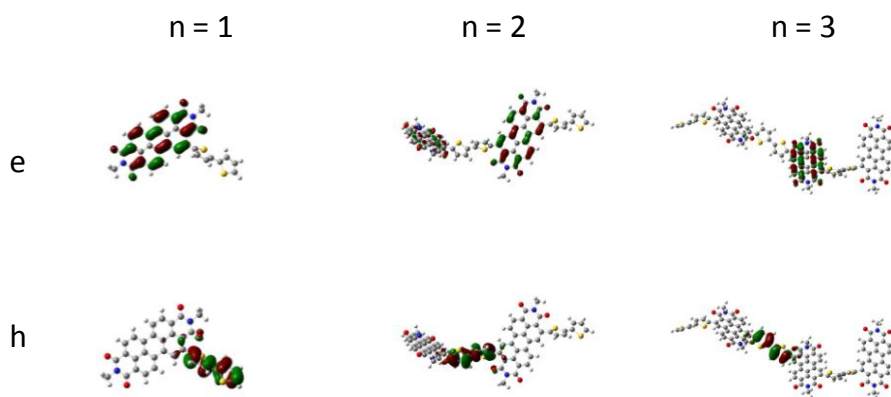

**Fig. S2b:** Natural transition orbital (NTO) analysis for the first singlet transition ( $S_0 \rightarrow S_1$ ) of  $r$ -(PDI-2T) $_n$  oligomers (e = electron, h = hole); B3LYP//B3LYP (isosurface value 0.03).

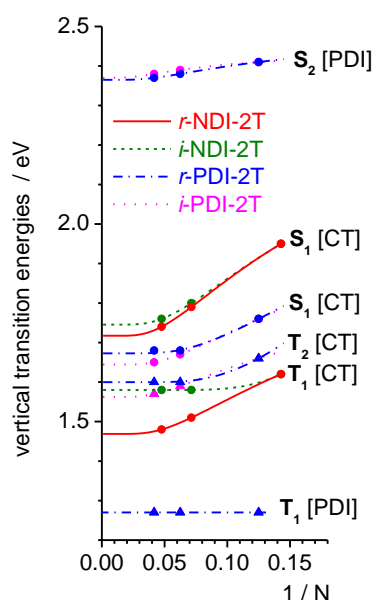

**Fig. S3:** Vertical transition energies of  $r/i$ -(NDI-2T) $_n$  (i.e.  $S_1$ ,  $T_1$ ) and  $r/i$ -(PDI-2T) $_n$  (i.e.  $S_1$ ,  $S_2$ ,  $T_1$ ,  $T_2$ ) co-oligomers, calculated at the TD-DFT (B3LYP//B3LYP) level of theory, as a function of the  $1/N$ . The nature of the transition is indicated in brackets (CT = charge transfer, PDI = PDI localized).

**Table S2a:** Vertical  $S_0 \rightarrow S_1$  and  $S_0 \rightarrow T_1$  electronic transition energies  $E$  with oscillator strength  $f$ , CI description (contributions  $\geq 5\%$ ), their nature and singlet-triplet gaps of (NDI-2T) $_n$  oligomers calculated at the TD-DFT (B3LYP//B3LYP(6-311G\*)) level of theory.

| System            | state | $E$ / eV<br>( $\lambda$ / nm) | $f$   | main CI<br>configuration                                                        | nature | $\Delta E_{ST}$ /<br>eV |
|-------------------|-------|-------------------------------|-------|---------------------------------------------------------------------------------|--------|-------------------------|
| (NDI2T) $_1$      | $T_1$ | 1.62 (764)                    | —     | H $\rightarrow$ L (88%)<br>H.2 $\rightarrow$ L+1 (5%)                           | CT     | 0.33                    |
|                   | $S_1$ | 1.95 (635)                    | 0.155 | H $\rightarrow$ L (99%)                                                         | CT     |                         |
| $r$ -(NDI2T) $_2$ | $T_1$ | 1.51 (820)                    | —     | H $\rightarrow$ L (66%)<br>H $\rightarrow$ L+1 (20%)                            | CT     | 0.28                    |
|                   | $S_1$ | 1.79 (692)                    | 0.585 | H $\rightarrow$ L (85%)<br>H $\rightarrow$ L+1 (7%)<br>H-1 $\rightarrow$ L (5%) | CT     |                         |
| $i$ -(NDI2T) $_2$ | $T_1$ | 1.58 (783)                    | —     | H $\rightarrow$ L (65%)<br>H-1 $\rightarrow$ L (20%)                            | CT     | 0.22                    |
|                   | $S_1$ | 1.80 (687)                    | 0.533 | H $\rightarrow$ L (83%)<br>H $\rightarrow$ L+1 (9%)                             | CT     |                         |

|                                |                |            |       |                                                          |    |      |
|--------------------------------|----------------|------------|-------|----------------------------------------------------------|----|------|
|                                |                |            |       | H-1→L (5%)                                               |    |      |
| <i>r</i> -(NDI2T) <sub>3</sub> | T <sub>1</sub> | 1.48 (837) | —     | H→L (56%)<br>H→L+1 (15%)                                 | CT | 0.26 |
|                                | S <sub>1</sub> | 1.74 (713) | 1.054 | H→L (74%)<br>H-1→L (9%)<br>H→L+1 (9%)                    | CT |      |
| <i>i</i> -(NDI2T) <sub>3</sub> | T <sub>1</sub> | 1.58 (786) | —     | H→L (48%)<br>H-1→L (25%)<br>H-2→L+1 (8%)<br>H-1→L+1 (6%) | CT | 0.18 |
|                                | S <sub>1</sub> | 1.76 (703) | 0.968 | H→L (62%)<br>H-1→L (19%)<br>H→L+1 (5%)                   | CT |      |

**Table S2b:** Vertical electronic transition energies  $E$  with oscillator strengths  $f$  of **PDI-2T** oligomers calculated at the TD-DFT (B3LYP//B3LYP(6-311G\*)) level of theory with CI description (contributions  $\geq 5\%$ ): lowest singlet and triplet states with CT character, lowest PDI-localized triplet states, most intense singlet transitions ( $f > 0.2 f_{\max}$ ); singlet-triplet gaps

| System                         | state          | E / eV<br>( $\lambda$ / nm) | $f$   | main CI<br>configuration                                     | nature | $\Delta E_{ST}$ /<br>eV |
|--------------------------------|----------------|-----------------------------|-------|--------------------------------------------------------------|--------|-------------------------|
| (PDI2T) <sub>1</sub>           | T <sub>1</sub> | 1.27 (977)                  | —     | H-1→L (94%)                                                  | PDI    | 1.14                    |
|                                | T <sub>2</sub> | 1.66 (745)                  | —     | H→L (91%)                                                    | CT     | 0.10                    |
|                                | S <sub>1</sub> | 1.76 (703)                  | 0.052 | H→L (99%)                                                    | CT     |                         |
|                                | S <sub>2</sub> | 2.41 (514)                  | 0.684 | H-1→L (99%)                                                  | PDI    |                         |
| <i>r</i> -(PDI2T) <sub>2</sub> | T <sub>1</sub> | 1.27 (978)                  | —     | H-2→L+1 (74%)<br>H-2→L (18%)                                 | PDI    | 1.11                    |
|                                | T <sub>3</sub> | 1.60 (773)                  | —     | H→L (79%)<br>H→L+1 (7%)                                      | CT     | 0.08                    |
|                                | S <sub>1</sub> | 1.68 (737)                  | 0.136 | H→L (97%)                                                    | CT     |                         |
|                                | S <sub>6</sub> | 2.38 (522)                  | 0.340 | H-3→L (75%)<br>H-3→L+1 (18%)                                 | PDI    |                         |
|                                | S <sub>7</sub> | 2.39 (519)                  | 0.380 | H-3→L+1 (55%)<br>H-2→L+1 (39%)                               | PDI    |                         |
|                                | S <sub>8</sub> | 2.42 (512)                  | 0.750 | H-3→L (17%)<br>H-3→L+1 (27%)<br>H-2→L (10%)<br>H-2→L+1 (46%) | PDI    |                         |
| <i>i</i> -(PDI2T) <sub>2</sub> | T <sub>1</sub> | 1.27 (977)                  | —     | H-2→L (38%)<br>H-3→L (33%)<br>H-2→L+1 (16%)<br>H-3→L+1 (9%)  | PDI    | 1.12                    |
|                                | T <sub>3</sub> | 1.59 (782)                  | —     | H→L (49%)<br>H→L+1 (42%)                                     | CT     | 0.08                    |
|                                | S <sub>1</sub> | 1.67 (743)                  | 0.188 | H→L (81%)<br>H→L+1 (12%)                                     | CT     |                         |
|                                | S <sub>7</sub> | 2.39 (519)                  | 0.529 | H-2→L+1 (67%)<br>H-3→L (18%)<br>H-3→L+1 (11%)                | PDI    |                         |
| <i>r</i> -(PDI2T) <sub>3</sub> | T <sub>1</sub> | 1.27 (978)                  | —     | H-3→L+1 (70%)<br>H-3→L (11%)<br>H-3→L+2 (10%)                | PDI    | 1.10                    |
|                                | T <sub>4</sub> | 1.60 (774)                  | —     | H→L (62%)<br>H-1→L (19%)                                     | CT     | 0.08                    |

|                                |                 |            |        |                                                                |     |      |
|--------------------------------|-----------------|------------|--------|----------------------------------------------------------------|-----|------|
|                                | S <sub>1</sub>  | 1.68 (738) | 0.1826 | H→L+1 (9%)<br>H→L (80%)<br>H→L+1 (13%)<br>H-1→L (5%)           | CT  |      |
|                                | S <sub>12</sub> | 2.37 (524) | 0.4494 | H-5→L+1 (62%)<br>H-4→L+2 (18%)<br>H-3→L+1 (6%)<br>H-4→L+1 (6%) | PDI |      |
| <i>i</i> -(PDI2T) <sub>3</sub> | T <sub>1</sub>  | 1.27 (978) | —      | H-4→L+1 (59%)<br>H-4→L (23%)                                   | PDI | 1.10 |
|                                | T <sub>4</sub>  | 1.57 (790) | —      | H→L (62%)<br>H→L+1 (18%)<br>H-1→L+2 (7%)<br>H-1→L (5%)         | CT  | 0.08 |
|                                | S <sub>1</sub>  | 1.65 (751) | 0.3627 | H→L (70%)<br>H→L+1 (14%)<br>H-1→L (6%)<br>H-1→L+2 (5%)         | CT  |      |
|                                | S <sub>12</sub> | 2.37 (524) | 0.1742 | H-5→L+1 (53%)<br>H-5→L (22%)<br>H-4→L+1 (9%)                   | PDI |      |

### 3. TDA-B3LYP results and comparison to TD-M06HF

Here we present TDA-B3LYP results, and a comparison with TD-M06HF for the evolution of S<sub>1</sub> transition energies with chain length. While B3LYP has been shown to overestimate the chain length dependence in transition energies for many oligomeric series (including oligothiophenes),<sup>D</sup> and M06HF has been shown to provide slopes in better agreement with experiments,<sup>D</sup> it would seem that in this particular case, the monomer-polymer shift in S<sub>1</sub> for *r*-(*i*-) **NDI-2T** predicted by the two functionals is quite similar; M06HF yields a shift of -0.33 (0.24) eV, and surprisingly, B3LYP yields a smaller shift of -0.27 (0.24) eV. The equivalent shift for T<sub>1</sub> according to TDA-B3LYP is smaller at just -0.15 (0.06) eV, consistent with the fact that triplets are normally more localized than singlets. Hence, though we expect that for many polymers (including oligothiophenes), extrapolated B3LYP S<sub>1</sub> energies would be more severely underestimated than T<sub>1</sub> energies, and hence S<sub>1</sub>-T<sub>1</sub> gaps would likely be underestimated, in the specific case of the polymers studied here, this does not seem to be the case. If anything, the contrary may be true; if we trust M06HF to provide more accurate chain length dependence (in this case a stronger chain length dependence than B3LYP), this would suggest B3LYP S<sub>1</sub>-T<sub>1</sub> gaps could be slightly underestimated (but by small amounts of 0.06 (0.01) eV).

**Table S3:** Singlet-triplet gaps as calculated at the TDA-DFT (B3LYP//B3LYP(6-311G\*)) level of theory. The last two rows are extrapolated polymer values.

| System                         | TDA-B3LYP           |                     |         | TD-M06HF            |
|--------------------------------|---------------------|---------------------|---------|---------------------|
|                                | S <sub>1</sub> (eV) | T <sub>1</sub> (eV) | ST (eV) | S <sub>1</sub> (eV) |
| (NDI2T) <sub>1</sub>           | 2.00                | 1.67                | 0.33    | 3.41                |
| <i>r</i> -(NDI2T) <sub>2</sub> | 1.82                | 1.56                | 0.26    | 3.22                |
| <i>i</i> -(NDI2T) <sub>2</sub> | 1.83                | 1.62                | 0.2     | 3.29                |
| <i>r</i> -(NDI2T) <sub>3</sub> | 1.76                | 1.54                | 0.23    | 3.14                |
| <i>i</i> -(NDI2T) <sub>3</sub> | 1.78                | 1.62                | 0.17    | 3.23                |
| <i>r</i> -P(NDI2T)             | 1.74                | 1.53                | 0.21    | 3.08                |
| <i>i</i> -P(NDI2T)             | 1.77                | 1.61                | 0.15    | 3.17                |

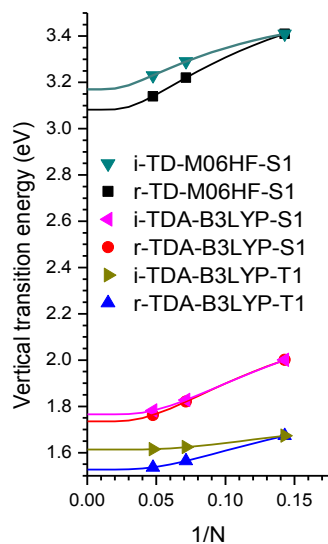

**Fig. S4:** Singlet and triplet vertical transition energies of *r/i*NDI-2T co-oligomers, as calculated at the TDA-DFT (B3LYP//B3LYP) and TD-DFT (M06HF//B3LYP) levels of theory, as a function of the  $1/N$ .



#### 4. CAM-B3LYP results

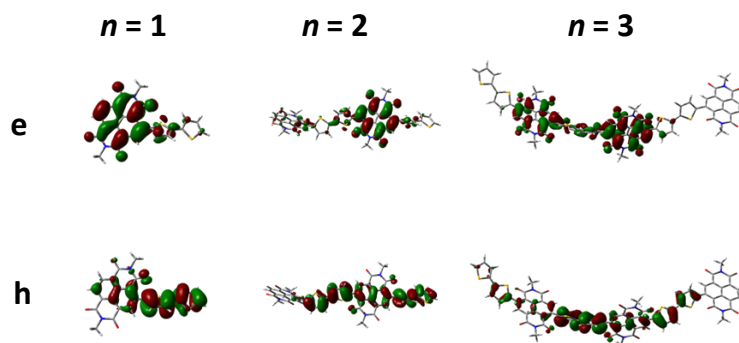

**Fig. S5a:** Natural transition orbital (NTO) analysis for the first singlet transition ( $S_0 \rightarrow S_1$ ) of  $r$ -(NDI-2T) $_n$  oligomers (e = electron, h = hole); CAM-B3LYP//B3LYP (isosurface value 0.03).

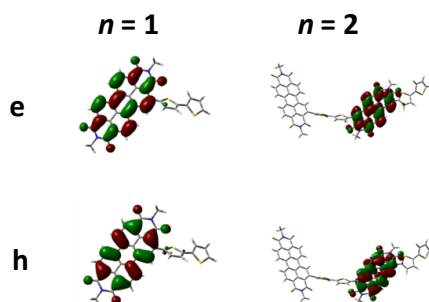

**Fig. S5b:** Natural transition orbital (NTO) analysis for the first singlet transition ( $S_0 \rightarrow S_1$ ) of  $r$ -(PDI-2T) $_n$  oligomers (e = electron, h = hole); CAM-B3LYP//B3LYP (isosurface value 0.03).

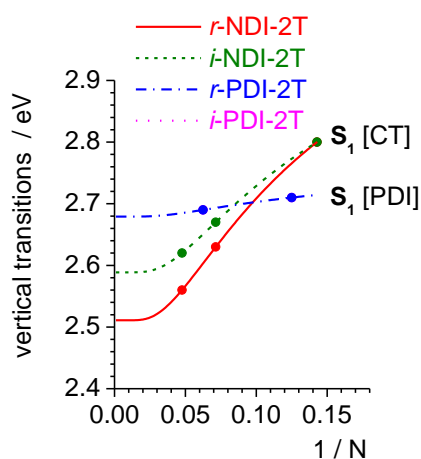

**Fig. S6:** Vertical  $S_0 \rightarrow S_1$  transition energies  $s$  in  $r/i$ -(NDI-2T) $_n$  and (PDI-2T) $_n$  co-oligomers, calculated at the TD-DFT (CAM-B3LYP//B3LYP) level of theory, as a function of the inverse of the conjugated path length ( $1/N$ ), where  $N$  is the conjugated path, i.e. the number of double bonds along the shortest path between the terminal C-atoms. Solid lines are exponential fits to the calculated values. The nature of the transition is indicated in brackets (CT = charge transfer, PDI = PDI localized).

**Table S4a:** Vertical  $S_0 \rightarrow S_1$  electronic transition energies  $E$  with oscillator strength  $f$ , CI description (contributions  $\geq 5\%$ ) of **(NDI-2T)<sub>n</sub>** oligomers calculated at the TD-DFT (CAM-B3LYP//B3LYP(6-311G\*)) level of theory.

| System                         | state          | $E / \text{eV}$<br>( $\lambda / \text{nm}$ ) | $f$   | main CI configuration      |
|--------------------------------|----------------|----------------------------------------------|-------|----------------------------|
| (NDI2T) <sub>1</sub>           | S <sub>1</sub> | 2.81 (442)                                   | 0.251 | H→L (88%)<br>H-4→L (5%)    |
| <i>r</i> -(NDI2T) <sub>2</sub> | S <sub>1</sub> | 2.63 (472)                                   | 0.853 | H→L (77%)<br>H-1→L+1 (5%)  |
| <i>i</i> -(NDI2T) <sub>2</sub> | S <sub>1</sub> | 2.67 (464)                                   | 0.847 | H→L (76%)<br>H-1→L+1 (7%)  |
| <i>r</i> -(NDI2T) <sub>3</sub> | S <sub>1</sub> | 2.56 (484)                                   | 1.596 | H→L (60%)<br>H-1→L+1 (13%) |
| <i>i</i> -(NDI2T) <sub>3</sub> | S <sub>1</sub> | 2.62 (473)                                   | 1.547 | H→L (60%)<br>H-1→L+1 (15%) |

**Table S4b:** Vertical  $S_0 \rightarrow S_1$  electronic transition energies  $E$  with oscillator strength  $f$ , CI description (contributions  $\geq 5\%$ ) of **(PDI-2T)<sub>n</sub>** oligomers calculated at the TD-DFT (CAM-B3LYP//B3LYP(6-311G\*)) level of theory.

| System                         | state          | $E / \text{eV}$<br>( $\lambda / \text{nm}$ ) | $f$   | main CI configuration                         |
|--------------------------------|----------------|----------------------------------------------|-------|-----------------------------------------------|
| (PDI2T) <sub>1</sub>           | S <sub>1</sub> | 2.71 (458)                                   | 0.758 | H-1→L (84%)<br>H→L (14%)                      |
| <i>r</i> -(PDI2T) <sub>2</sub> | S <sub>1</sub> | 2.69 (461)                                   | 0.771 | H-3→L (53%)<br>H-2→L+1 (35%)<br>H-1→L (6%)    |
| <i>i</i> -(PDI2T) <sub>2</sub> | S <sub>1</sub> | 2.69 (461)                                   | 0.709 | H-3→L (39%)<br>H-2→L+1 (32%)<br>H-1→L (13%)   |
| <i>r</i> -(PDI2T) <sub>3</sub> | S <sub>1</sub> | 2.68 (462)                                   | 0.510 | H-5→L (44%)<br>H-4→L+1 (28%)<br>H-3→L+2 (18%) |

## 5. Calculated Absorption Spectra

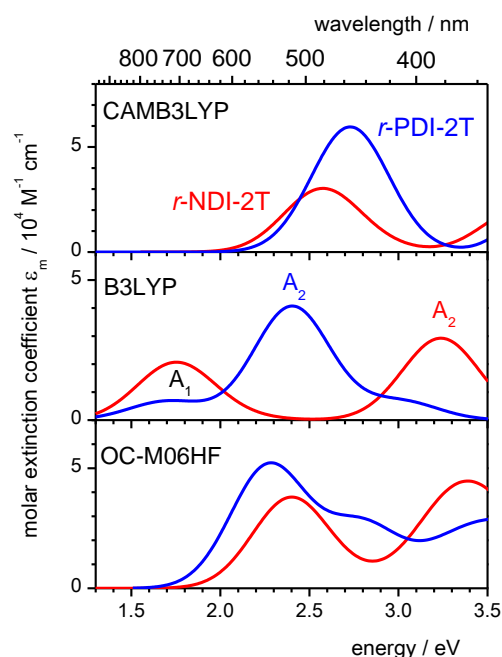

**Fig. S7:** TD-DFT calculated absorption spectra for  $(\text{NDI-2T})_3$  and  $(\text{PDI-2T})_2$ , based on B3LYP optimized geometries (pure vertical transitions, broadened by Gaussians of 0.25 eV width); given in units of molar extinction coefficient per repetition units.

### References

- [A] T. Yanai, D. Tew, N. Handy, *Chem. Phys. Lett.* 2004, 393, 51.
- [B] W. Wykes, B. Milián-Medina, J. Gierschner, *Front. Chem.* 2013, 1, 35.
- [C] Gaussian 09, Revision **D.01**, M. J. Frisch, G. W. Trucks, H. B. Schlegel, G. E. Scuseria, M. A. Robb, J. R. Cheeseman, G. Scalmani, V. Barone, B. Mennucci, G. A. Petersson, H. Nakatsuji, M. Caricato, X. Li, H. P. Hratchian, A. F. Izmaylov, J. Bloino, G. Zheng, J. L. Sonnenberg, M. Hada, M. Ehara, K. Toyota, R. Fukuda, J. Hasegawa, M. Ishida, T. Nakajima, Y. Honda, O. Kitao, H. Nakai, T. Vreven, J. A. Montgomery, Jr., J. E. Peralta, F. Ogliaro, M. Bearpark, J. J. Heyd, E. Brothers, K. N. Kudin, V. N. Staroverov, R. Kobayashi, J. Normand, K. Raghavachari, A. Rendell, J. C. Burant, S. S. Iyengar, J. Tomasi, M. Cossi, N. Rega, J. M. Millam, M. Klene, J. E. Knox, J. B. Cross, V. Bakken, C. Adamo, J. Jaramillo, R. Gomperts, R. E. Stratmann, O. Yazyev, A. J. Austin, R. Cammi, C. Pomelli, J. W. Ochterski, R. L. Martin, K. Morokuma, V. G. Zakrzewski, G. A. Voth, P. Salvador, J. J. Dannenberg, S. Dapprich, A. D. Daniels, Ö. Farkas, J. B. Foresman, J. V. Ortiz, J. Cioslowski, and D. J. Fox, Gaussian, Inc., Wallingford CT, 2009.
- [D] (a) T. Lu, F. Chen, *J. Comp. Chem.* 2012, 33, 580. (b) multiwfn.codeplex.com.
- [E] H. Meier, U. Stalmach, H. Kolshorn, *Acta Polym.* 1997, 48, 379
